# Supplementary material for: High-efficiency polymer–PbS hybrid solar cells via molecular engineering
Source: Royal Society of Chemistry journal article supplement (doi:10.1039/c4ta03995e), 2014-09-24
Supplement: c4ta03995e1.pdf [file c4ta03995e1.pdf]

## Electronic Supplementary Information (ESI)

### Molecular Design toward Efficient Polymer/PbS Hybrid Solar Cells

Jianyu Yuan, Aidan Gallagher, Zeke Liu, Yaxiang Sun and Wanli Ma\*

#### Experimental Section

##### *Characterization*

<sup>1</sup>H NMR data were performed on a Varian Unity Inova 400 MHz spectrometer with CDCl<sub>3</sub> as solvent and tetramethylsilane (TMS) as internal standard. The peaks are given in ppm, relative to TMS (0 ppm). Molecular weight and molecular weight distribution (PDI) were determined against a polystyrene standard by gel permeation chromatography (GPC) on a PL-GPC 50 apparatus at a flow rate of 1.0 mL/min at 40 °C, using THF as an eluent. Cyclic voltammetric (CV) measurements were carried out on a Zahner IM6 electrochemical workstation. Typically, a three-electrode cell equipped with a Pt plate coated with polymer as working electrode, a Ag/AgCl (0.01 M in anhydrous acetonitrile) reference electrode, and a Pt-wire counter electrode was employed. The measurements were conducted in anhydrous acetonitrile with tetrabutylammonium hexafluorophosphate (0.1M) under an argon atmosphere at a scan rate of 100 mV/s.

##### *Polymer synthesis:*

2,6-Di(trimethyltin)-N-(1-octylonyl)dithieno[3,2-b:2',3'-d]-pyrrole (1)<sup>1</sup>, 4,7-Dibromo-5-fluorobenzo[c][1,2,5]thiadiazole (2)<sup>2</sup>, 3,6-bis(5-bromo thien-2-yl)-2,5-b(2-ethylhexyl)pyrrolo[3,4-c]-pyrrole-1,4(2H, 5H)-dione (3)<sup>3</sup>, 4,7-di-2-thienyl-2,1,3-

benzothiadiazole (4)<sup>4</sup>, 4,7-di-2-furan-2,1,3-benzothiadiazole (5)<sup>4</sup> were prepared according to the previous report or with the similar procedure. **PDBT** were prepared according to the literature<sup>1</sup> with reaction time of 24 h; P3HT was purchased from Rieke Mental, inc.

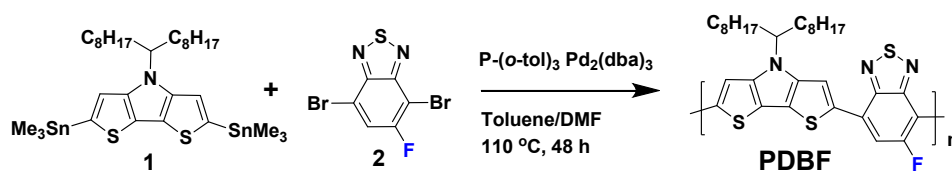

**PDBF:** In a 50 mL reaction tube, compound **1** (0.22 g, 0.3 mmol), compound **2** (0.09 g, 0.3 mmol) tri(*o*-tolyl)phosphine (0.02 g, 0.08 mmol), and Pd<sub>2</sub>(dba)<sub>3</sub> (0.01 g, 0.01 mmol) were dissolved in dry toluene/DMF (5 mL/0.5 mL) under argon. After stirred at 110 °C for 48 h, the mixture was cooled to room temperatures and precipitated in methanol (70 mL). The precipitate was filtered and washed with methanol (24 h) and hexane (24 h) successively in a soxhlet apparatus to remove oligomers and catalyst residue. Finally, the polymer was extracted with chloroform (10 h). The chloroform fraction was concentrated and precipitated in methanol. The precipitate was filtered and dried in vacuum at 80 °C overnight. **PDBF:** obtain as dark blue solid (110 mg, 61 %), GPC:  $M_n=12.0 \text{ kg mol}^{-1}$ , PDI=1.61. <sup>1</sup>H NMR (400 MHz, CDCl<sub>3</sub>): 8.50-8.10 (br, 1 H), 7.80-7.20 (br, 2H), 4.50-4.21 (br, 1 H), 2.60-1.80 (m, 4 H), 1.70-0.30 (m, 30 H).

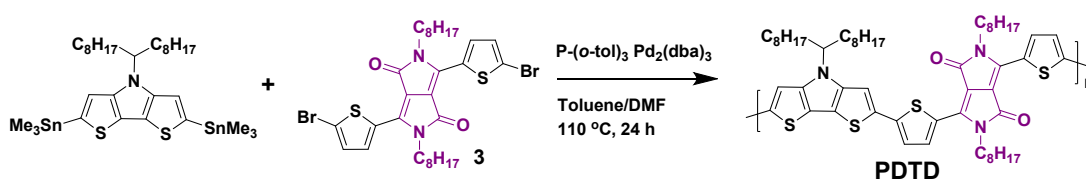

**PDTD:** In a 50 mL reaction tube, compound **1** (0.22 g, 0.3 mmol), compound **3** (0.21 g, 0.3 mmol) tri(*o*-tolyl)phosphine (0.02 g, 0.08 mmol), and Pd<sub>2</sub>(dba)<sub>3</sub> (0.01 g, 0.01 mmol) were dissolved in dry toluene/DMF (5 mL/0.5 mL) under argon. After stirred at 110 °C for 24 h, the mixture was cooled to room temperatures and precipitated in methanol (70 mL). The precipitate was filtered and washed with methanol (24 h) and hexane (24 h) successively in a soxhlet apparatus to remove oligomers and catalyst residue. Finally, the polymer was extracted with chloroform (10 h). The chloroform fraction was concentrated and precipitated in methanol. The precipitate was filtered and dried in vacuum at 80 °C overnight. **PDTD:** obtain as dark green solid (230 mg, 80 %), GPC:  $M_n=32.6 \text{ kg mol}^{-1}$ , PDI=1.75. <sup>1</sup>H NMR (400 MHz, CDCl<sub>3</sub>): δ (ppm) 9.20-8.50 (br, 2H), 7.60-6.85 (br, 4H), 4.20-3.55 (br, 3H), 2.25-1.80 (br, 4H), 1.72-0.75 (br, 62H).

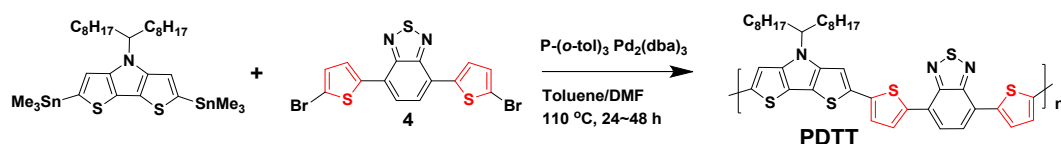

**PDTT:** In a 50 mL reaction tube, compound **1** (0.22 g, 0.3 mmol), compound **4** (0.14 g, 0.3 mmol) tri(*o*-tolyl)phosphine (0.02 g, 0.08 mmol), and Pd<sub>2</sub>(dba)<sub>3</sub> (0.01 g, 0.01 mmol) were dissolved in 5 mL dry toluene under argon. After stirred at 110 °C for 24 h, the mixture was cooled to room temperatures and precipitated in methanol (70 mL). The precipitate was filtered and washed with methanol (24 h) and hexane (24 h) successively in a soxhlet apparatus to remove oligomers and catalyst residue. Finally, the polymer was extracted with chloroform (10 h). The chloroform fraction was

concentrated and precipitated in methanol. The precipitate was filtered and dried in vacuum at 80 °C overnight. **PDTT**: obtain as dark purple solid (210 mg, 94 %) GPC:  $M_n=32.6 \text{ kg mol}^{-1}$ , PDI=1.75.  $^1\text{H NMR}$  (400 MHz,  $\text{CDCl}_3$ ):  $\delta$  (ppm) 8.20-8.00 (br, 2H), 8.00-7.60 (br, 4H), 7.30-7.00 (br, 2H), 4.40-4.20 (br, 1H), 2.20-1.80 (br, 4H), 1.20-0.50 (br, 30H).

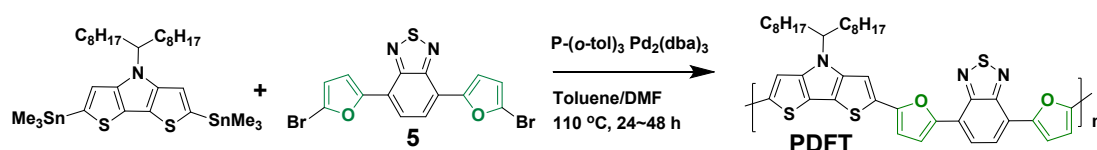

**PDFT**: In a 50 mL reaction tube, compound **1** (0.22 g, 0.3 mmol), compound **5** (0.13 g, 0.3 mmol) tri(*o*-tolyl)phosphine (0.02 g, 0.08 mmol), and  $\text{Pd}_2(\text{dba})_3$  (0.01 g, 0.01 mmol) were dissolved in 5 mL dry toluene under argon. After stirred at 110 °C for 24 h, the mixture was cooled to room temperatures and precipitated in methanol (130 mL). The precipitate was filtered and washed with methanol (24 h) and hexane (24 h) successively in a soxhlet apparatus to remove oligomers and catalyst residue. Finally, the polymer was extracted with chloroform (10 h). The chloroform fraction was concentrated and precipitated in methanol. The precipitate was filtered and dried in vacuum at 80 °C overnight. **PDFT**: obtain as dark purple solid (200 mg, 93 %), GPC:  $M_n=37.2 \text{ kg mol}^{-1}$ , PDI=2.14.  $^1\text{H NMR}$  (400 MHz,  $\text{CDCl}_3$ ):  $\delta$  (ppm) 8.20-7.80 (br, 4H), 7.80-7.60 (br, 2H), 7.30-6.80 (br, 2H), 4.40-4.20 (br, 1H), 2.20-1.80 (br, 4H), 1.50-0.75 (br, 30H).

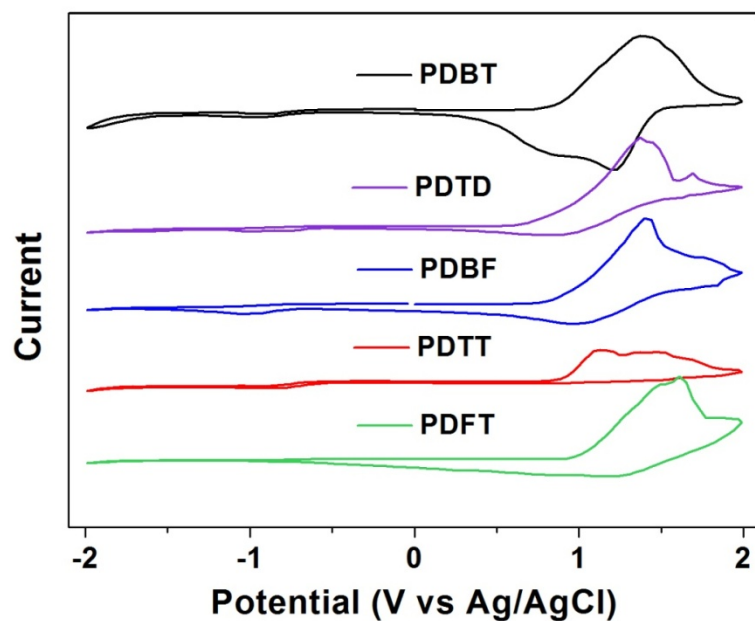

**Figure S1** Cyclic voltammograms of PBDT-T-TPDs in the CH<sub>3</sub>CN solution at a scan rate of 100 mV s<sup>-1</sup>

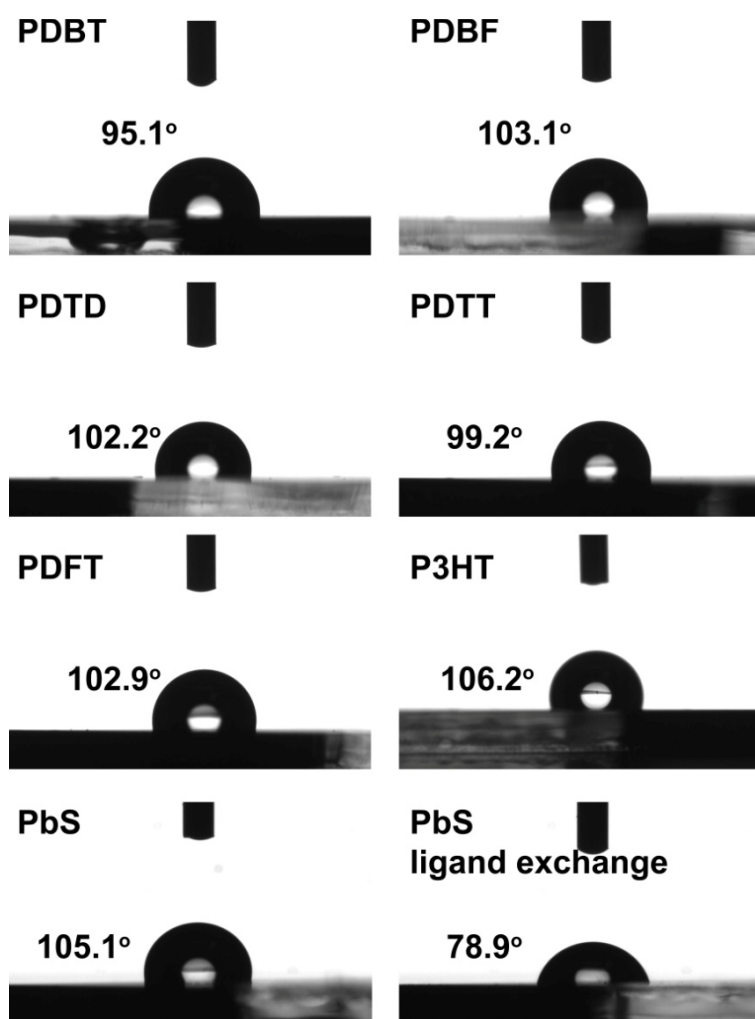

**Figure S2** Contact angle measurements of pristine polymers and PbS QD.

**Table S1.** Summary of the devices performance based on polymer and PbS with varying first exciton energies.

| Polymer | QD Growth Temperature (°C) | $V_{oc}$ (V) | $J_{sc}$ (mA/cm <sup>2</sup> ) | $FF$      | $PCE$ (%) |
|---------|----------------------------|--------------|--------------------------------|-----------|-----------|
| PDBF    | 60                         | 0.45±0.00    | 9.98±0.1                       | 0.27±0.04 | 1.21±0.19 |
| PDBF    | 80                         | 0.58±0.01    | 11.06±0.2                      | 0.56±0.02 | 3.60±0.25 |
| PDBF    | 100                        | 0.47±0.01    | 13.87±0.2                      | 0.46±0.02 | 3.00±0.22 |
| PDBF    | 120                        | 0.47±0.01    | 13.12±0.2                      | 0.52±0.01 | 3.20±0.18 |
| PDBF    | 140                        | 0.43±0.01    | 10.15±0.1                      | 0.44±0.02 | 1.92±0.14 |
| PDTD    | 60                         | 0.26±0.01    | 8.32±0.1                       | 0.27±0.03 | 0.58±0.10 |
| PDTD    | 80                         | 0.51±0.00    | 10.21±0.2                      | 0.42±0.02 | 2.19±0.13 |
| PDTD    | 100                        | 0.52±0.00    | 11.14±0.1                      | 0.55±0.01 | 3.19±0.06 |
| PDTD    | 120                        | 0.49±0.01    | 12.76±0.1                      | 0.56±0.01 | 3.50±0.15 |
| PDTD    | 140                        | 0.38±0.01    | 9.69±0.1                       | 0.27±0.04 | 0.99±0.20 |
| PDTT    | 60                         | 0.40±0.01    | 9.34±0.0                       | 0.33±0.03 | 1.23±0.13 |
| PDTT    | 80                         | 0.46±0.00    | 10.01±0.1                      | 0.41±0.02 | 1.89±0.10 |
| PDTT    | 100                        | 0.44±0.01    | 12.35±0.2                      | 0.51±0.01 | 2.82±0.4  |
| PDTT    | 120                        | 0.45±0.01    | 11.25±0.1                      | 0.43±0.02 | 2.17±0.13 |
| PDTT    | 140                        | 0.40±0.01    | 9.71±0.1                       | 0.34±0.03 | 1.32±0.17 |
| PDFT    | 60                         | 0.31±0.02    | 8.06±0.3                       | 0.26±0.04 | 0.65±0.18 |
| PDFT    | 80                         | 0.40±0.01    | 9.73±0.2                       | 0.33±0.03 | 1.28±0.19 |
| PDFT    | 100                        | 0.41±0.01    | 12.06±0.3                      | 0.49±0.00 | 2.42±0.13 |
| PDFT    | 120                        | 0.44±0.01    | 10.89±0.2                      | 0.44±0.02 | 2.10±0.19 |
| PDFT    | 140                        | 0.41±0.01    | 9.28±0.1                       | 0.30±0.03 | 1.14±0.16 |
| P3HT    | 60                         | 0.23±0.01    | 7.49±0.2                       | 0.26±0.04 | 0.45±0.07 |
| P3HT    | 80                         | 0.46±0.00    | 8.79±0.3                       | 0.45±0.02 | 1.82±0.14 |
| P3HT    | 100                        | 0.44±0.01    | 10.70±0.2                      | 0.43±0.02 | 2.02±0.14 |
| P3HT    | 120                        | 0.44±0.01    | 11.82±0.1                      | 0.46±0.01 | 2.39±0.12 |
| P3HT    | 140                        | 0.51±0.00    | 11.62±0.2                      | 0.42±0.02 | 2.49±0.16 |

The data shown are the average values obtained from 6 devices with standard deviation

1. Yue, W.; Zhao, Y.; Shao, S.; Tian, H.; Xie, Z.; Geng, Y.; Wang, F. *J. Mater. Chem.* 2009, **19**, 2199.
2. van der Poll, T. S.; Love, J. A.; Nguyen, T.-Q.; Bazan, G. C. *Adv. Mater.* 2012, **24**, 3646.
3. Yuan, J.; Huang, X.; Zhang, F.; Lu, J.; Zhai, Z.; Di, C.; Jiang, Z.; Ma, W. *J. Mater. Chem.* 2012, **22**, 22734.
4. Svensson, M.; Zhang, F.; Veenstra, S. C.; Verhees, W. J. H.; Hummelen, J. C.; Kroon, J. M.; Inganäs, O.; Andersson, M. R. *Adv. Mater.* 2003, **15**, 988.
